# Supplementary material for: Two-Effects-in-One: Kinetic Quantum and Molecular Sieving Effect in a Robust-Flexible [Th6Co2] Cage for both Isotope and Isomer Separation
Source: Research Square preprint supplement (doi:10.21203/rs.3.rs-99357/v1), 2020-11-09
Supplement: Supplementary file 1 [file 48e870ee0fb7919f742621c6.docx]

Two-Effects-in-One: Kinetic Quantum and Molecular Sieving Effect in a Robust-Flexible [Th6Co2] Cage for both Isotope and Isomer Separation

Mengjia Yin,a Rajamani Krishna,c Wenjing Wang,b Daqiang Yuan,b Yaling Fan,a Xuefeng Feng,a Li Wang,a and Feng Luoa*

Corresponding author: [ecitluofeng@163.com](mailto:ecitluofeng@163.com)

**Experimental Section**

**Materials and physical measurements.** All chemicals are directly purchased from innochem with no further purification. The optical images were accepted from Optec SZ810 microscope. Thermogravimetric analysis (TG) was performed by a TGA Q500 under a N2 atmosphere from room temperature to 800 °C at a rate of 10 °C/min. The data of X-ray powder diffraction were collected on a Bruker AXSD8 Discover powder diffractometer at 40 kV/40 mA for Cu Kα (λ = 1.5406 Å) at room temperature in the range of 5-50 °(2θ) with a scan speed of 0.1 °per step. The gas adsorption isotherms were collected on a Belsorp-max. The N2, D2, H2, C2H4, C3H6, n-C4H10, and *iso*-C4H10 gases used in this adsorption experiment were Ultrahigh-purity-grade (>99.999%). The vapour adsorption was carried out on Belsorp-max for the pure C6 isomer.

**Gas adsorption and vapour adsorption Measurements.** Before carrying out the adsorption experiment, the samples of **Th-Co-Cage-1** was firstlytreated by immerging in CH3OH for three days to make solvent exchange. Then the samples about 100 mg was degased at 150 °C under vacuum for 24 h in Belsorp-max. The BET was investigated by nitrogen adsorption at 77 K. The single-component isotherms of D2, H2, C2H4, C3H6, n-C4H10, and *iso*-C4H10 were collected on the Belsorp-max. To maintain the experimental temperatures liquid nitrogen (77 K) and temperature-programmed water bath (273, 298, and 303 K) were used respectively. Similarly, the gas was replaced by the pure C6 isomers to carry out vapour adsorption test.

**Stability test.** Water stability test was carried out by immerging 100 mg samples in water and boiling water for 7 days. Then PXRD is used to trace the stability. The pH stability test was carried out by immerging 100 mg samples in water with pH=3.0-12 for 1 days. Then PXRD is used to trace the stability. The thermal stability test was carried out by calcinning 100 mg samples in N2 at certain temperature for 1 days. Then PXRD is used to trace the stability.

**X-ray Crystallography.** X-ray diffraction data of **Th-Co-Cage-1** was collected at 298 K on a Bruker-Appex (II) diffractometer using graphite monochromated MoKα radiation (λ=0.71073 Å). The data reduction included a correction for Lorentz and polarization effects, with an applied multi-scan absorption correction (SADABS). The crystal structure was solved and refined using the SHELXTL program suite. Direct methods yielded all non-hydrogen atoms, which were refined with anisotropic thermal parameters. All hydrogen atom positions were calculated geometrically and were riding on their respective atoms. The SQUEEZE subroutine of the PLATON software suite was used to remove the scattering from the highly disordered guest molecules. CCDC 2019205 contains the supplementary crystallographic data of **Th-Co-Cage-1**. The data can be obtained free of charge from the Cambridge Crystallographic Data Centre via [www.ccdc.cam.ac.uk/](http://www.ccdc.cam.ac.uk/)data_ request/cif.

**Adsorption kinetics.** This was carried out by a batch experiments. In a typical experiment, approximate 10 mg activated adsorbent was placed a dried little glass bottle, then it was placed into a big glass bottle with 0.2 mL pure nHEX, or 3MP, or 2MP, or 22DMB, or 23 DMB solution. Then the big glass bottle was sealed and placed at certain temperature higher than the corresponding boiling temperature about 5°C for each C6 isomer. Then the samples were taken out every five seconds. The difference in weight between the activated samples and the samples after loading C6 vapour was obtained through a 1/10000 scales.

**C6 isomer separation.** Batch experiments was carried out to test the adsorption of C6 isomers in the liquid phase. In a typical experiment, 10 mg adsorbent were accurately measured and immersed in 0.25 mL equal volume mixtures such as nHEX/3MP, nHEX/2MP, nHEX/22DMB, 2MP/3MP, 2MP/22DMB, 3MP/22DMB, nHEX/3MP/2MP, nHEX/3MP/22DMB, and nHEX/2MP/3MP/ 22DMB for 24 h at room temperature. Then, the samples were dried on filter paper for 12 hours to remove liquid from the surface of the crystals. The guest molecules were extracted with butyl acetate (1mL) overnight. Extracted liquid (0.5 mL) was analyzed by GC, and the content and purity of C6 isomer was obtained. Because GC shows few effect on the separation of 23DMB and 22DMB, thus, in this work, we just researched 22DMB.

**Breakthrough experiment for gas separation.** In a typical experiment, 0.8 g activated adsorbent was added into the packed column (Ø 46 mm×150 mm). Before starting each experiment, helium reference gas is flushed through the column and then the gas flow is switched to the desired gas mixture at the setted flow rate. The gas mixture downstream the column was monitored using a Hiden mass-spectrometer.

**Breakthrough experiment for liquid separation.** In a typical experiment, 0.8 g activated adsorbent was added into the packed column (Ø 46 mm×150 mm). Then, 5 ml equal volume of nHEX/2MP/3MP/22DMB mixed solution was added into this column. The breaked solution was obtained every 5 second, which was futher analyzed by GC, giving the content of C6 isomer. A multicomponent breakthrough curves was obtained by plotting the change of content of each C6 isomers with time. Because GC shows few effect on the separation of 23DMB and 22DMB, thus, in this work, we just researched 22DMB.

**Figure S1.** View of the nine-connected ThCo dinuclearnode. Each ThCo dinuclear node connects to nine identical three-connected L2- nodes.

**Figure S2.** View of the three-connected L2- node. Each L2- node connects to three identical nine-connected ThCo dinuclear nodes.

**Figure S3.** The TG plots of as-synthesized **Th-Co-Cage-1** and the CH3OH-exchanged samples.

**Figure S4.** The N2 adsorption at 77 K with the insert of the distribution of pore size.

**Figure S5.** The H2, D2 adsorption isotherms at 87 K.

**Figure S6.** The Qst value of D2 and H2 based on the adsorption data at 77 K and 87 K.

**Figure S7.** The D2/H2 selectivity at 77 K.

**Figure S8.** A comparison between robust adsorption towards C2H4 and robust-flexible adsorption of C3H6.

**Figure S9.** The n-butane/*iso*-butane selectivity at 298 K.

**Figure S10.** Adsorption kinetics of nHEX, 3MP, 2MP, 22DMB, and 23DMB upon activated **Th-Co-Cage-1** samples.

**Figure S11.** The GC standard peaks for the solution of nHEX, 2MP, 3MP, and 22DMB.

**Figure S12.** The GC results of the solution for nHEX/3MP separation upon activated **Th-Co-Cage-1** samples.

**Figure S13.** The GC results of the solution for nHEX/2MP separation upon activated **Th-Co-Cage-1** samples.

**Figure S14.** The GC results of the solution for nHEX/22DMB separation upon activated **Th-Co-Cage-1** samples.

**Figure S15.** The GC results of the solution for 3MP/2MP separation upon activated **Th-Co-Cage-1** samples.

**Figure S16.** The GC results of the solution for 22DMB/2MP separation upon activated **Th-Co-Cage-1** samples.

**Figure S17.** The GC results of the solution for 22DMB/3MP separation upon activated **Th-Co-Cage-1** samples.

**Figure S18.** The GC results of the solution for nHEX/3MP/22DMB separation upon activated **Th-Co-Cage-1** samples.

**Figure S19.** The GC results of the solution for 2MP/3MP/22DMB separation upon activated **Th-Co-Cage-1** samples.

**Figure S20.** The GC results of the solution for nHEX/2MP/3MP/22DMB separation upon activated **Th-Co-Cage-1** samples.
